# Supplementary material for: Intracellular expression of a fluorogenic DNA aptamer using retron Eco2
Source: eLife. 2026 Mar 3;13:RP99554. doi: 10.7554/eLife.99554 (PMC12956279; doi:10.7554/eLife.99554)
Supplement: Supplementary file 1. [file elife-99554-supp1.xlsx]

## Sheet: Supplementary file 1a
Retron Eco2	CATAAACACGCATGTAGGCAGATTTGTTGGTTGTGAATCGCAACCAGTGGCCTTAATGGCAGGAGGAATCGCCTCCCTAAAATCCTTGATTCAGAGCTATACGGCAGGTGTGCTGTGCGAAGGAGTGCCTGCATGCGTTTCTCCTTGGCCTTTTTTCCTCTGGGATGAAGAAGAAATGACAAAAACATCTAAACTTGACGCACTTAGGGCTGCTACTTCACGTGAAGACTTGGCTAAAATTTTAGATgTTAAGTTGGTATTTTTAACTAACGTTCTATATAGAATCGGCTCGGATAATCAATACACTCAATTTACAATACCGAAGAAAGGAAAAGGGGTAAGGACTATTTCTGCACCTACAGACCGGTTGAAGGACATCCAACGAAGAATATGTGACTT…

## Sheet: Supplementary file 1b
Oligonucleotides / Ultramers used for in vitro experiments
4LE-v1	TCCTTCGCACAGCACATAGTAGGGATGATGCGGCAGTGGGCTTCGCAGAACAGTGTTTATTCTGCGAGGGGACTACCTGCCGTATAGCTCTGAATCAAGGATTTTAGGGAGGCGATTCCTCCTGCC
4LE-v2	TCCTTCGCACAGCACACCTGCCGTATTAGTAGGGATGATGCGGCAGTGGGCTTCGCAGAACAGTGTTTATTCTGCGAGGGGACTAAGCTCTGAATCAAGGATTTTAGGGAGGCGATTCCTCCTGCC
4LE-v3	TCCTTCGCACAGCACACCTGCCGTATAGCTCTGAATCAATAGTAGGGATGATGCGGCAGTGGGCTTCGCAGAACAGTGTTTATTCTGCGAGGGGACTAGGATTTTAGGGAGGCGATTCCTCCTGCC
4LE-v4	TCCTTCGCACAGCACACCTGCCGTATAGCTCTGAATCAAGGATTTTAGGGAGGCGATTAGTAGGGATGATGCGGCAGTGGGCTTCGCAGAACAGTGTTTATTCTGCGAGGGGACTATCCTCCTGCC
8LE-v1	TCCTTCGCACAGCACAGTCTTAGTAGGGATGATGCGGCAGTGGGCTTCGCAGAACAGTGTTTATTCTGCGAGGGGACTAAGACCCTGCCGTATAGCTCTGAATCAAGGATTTTAGGGAGGCGATTCCTCCTGCC
8LE-v2	TCCTTCGCACAGCACACCTGCCGTATGTCTTAGTAGGGATGATGCGGCAGTGGGCTTCGCAGAACAGTGTTTATTCTGCGAGGGGACTAAGACAGCTCTGAATCAAGGATTTTAGGGAGGCGATTCCTCCTGCC
8LE-v3	TCCTTCGCACAGCACACCTGCCGTATAGCTCTGAATCAAGTCTTAGTAGGGATGATGCGGCAGTGGGCTTCGCAGAACAGTGTTTATTCTGCGAGGGGACTAAGACGGATTTTAGGGAGGCGATTCCTCCTGCC
8LE-v4	TCCTTCGCACAGCACACCTGCCGTATAGCTCTGAATCAAGGATTTTAGGGAGGCGATGTCTTAGTAGGGATGATGCGGCAGTGGGCTTCGCAGAACAGTGTTTATTCTGCGAGGGGACTAAGACTCCTCCTGCC
11LE	TCCTTCGCACAGCACACCTGCCGTATAGCTCTGAATCAAGGATTTTAGGGAGGCGATGGTGTCTTAGTAGGGATGATGCGGCAGTGGGCTTCGCAGAACAGTGTTTATTCTGCGAGGGGACTAAGACTCCTCCTCCTGCC
FLE	TCCTTCGCACAGCACACCTGCCGTATAGCTCTGAATCAAGGATTTTAGGGAGGCGATAACGTGCTCAAGGTGTCTTAGTAGGGATGATGCGGCAGTGGGCTTCGCAGAACAGTGTTTATTCTGCGAGGGGACTAAGACTCCTTCAGCAAGTTAAGCTCCTCCTGCC

## Sheet: Supplementary file 1c
qPCR primers
Eco2 inside msd FWD	AGGAGGAATCGCCTCCCTAA
Eco2 inside msd REV	TCCTTCGCACAGCACACCT
outside msd REV	AAGGCCAAGGAGAAACGCAT
