# Supplementary figures and images for: Intracellular Expression of a Fluorogenic DNA Aptamer Using Retron Eco2
Source: eLife journal article supplement (doi:10.7554/elife.99554), 2024-07-10

**Ladder  
(nt)**

**130**

**110**

**90**

**70**

**50**

**L  
Eco-2  
Control**

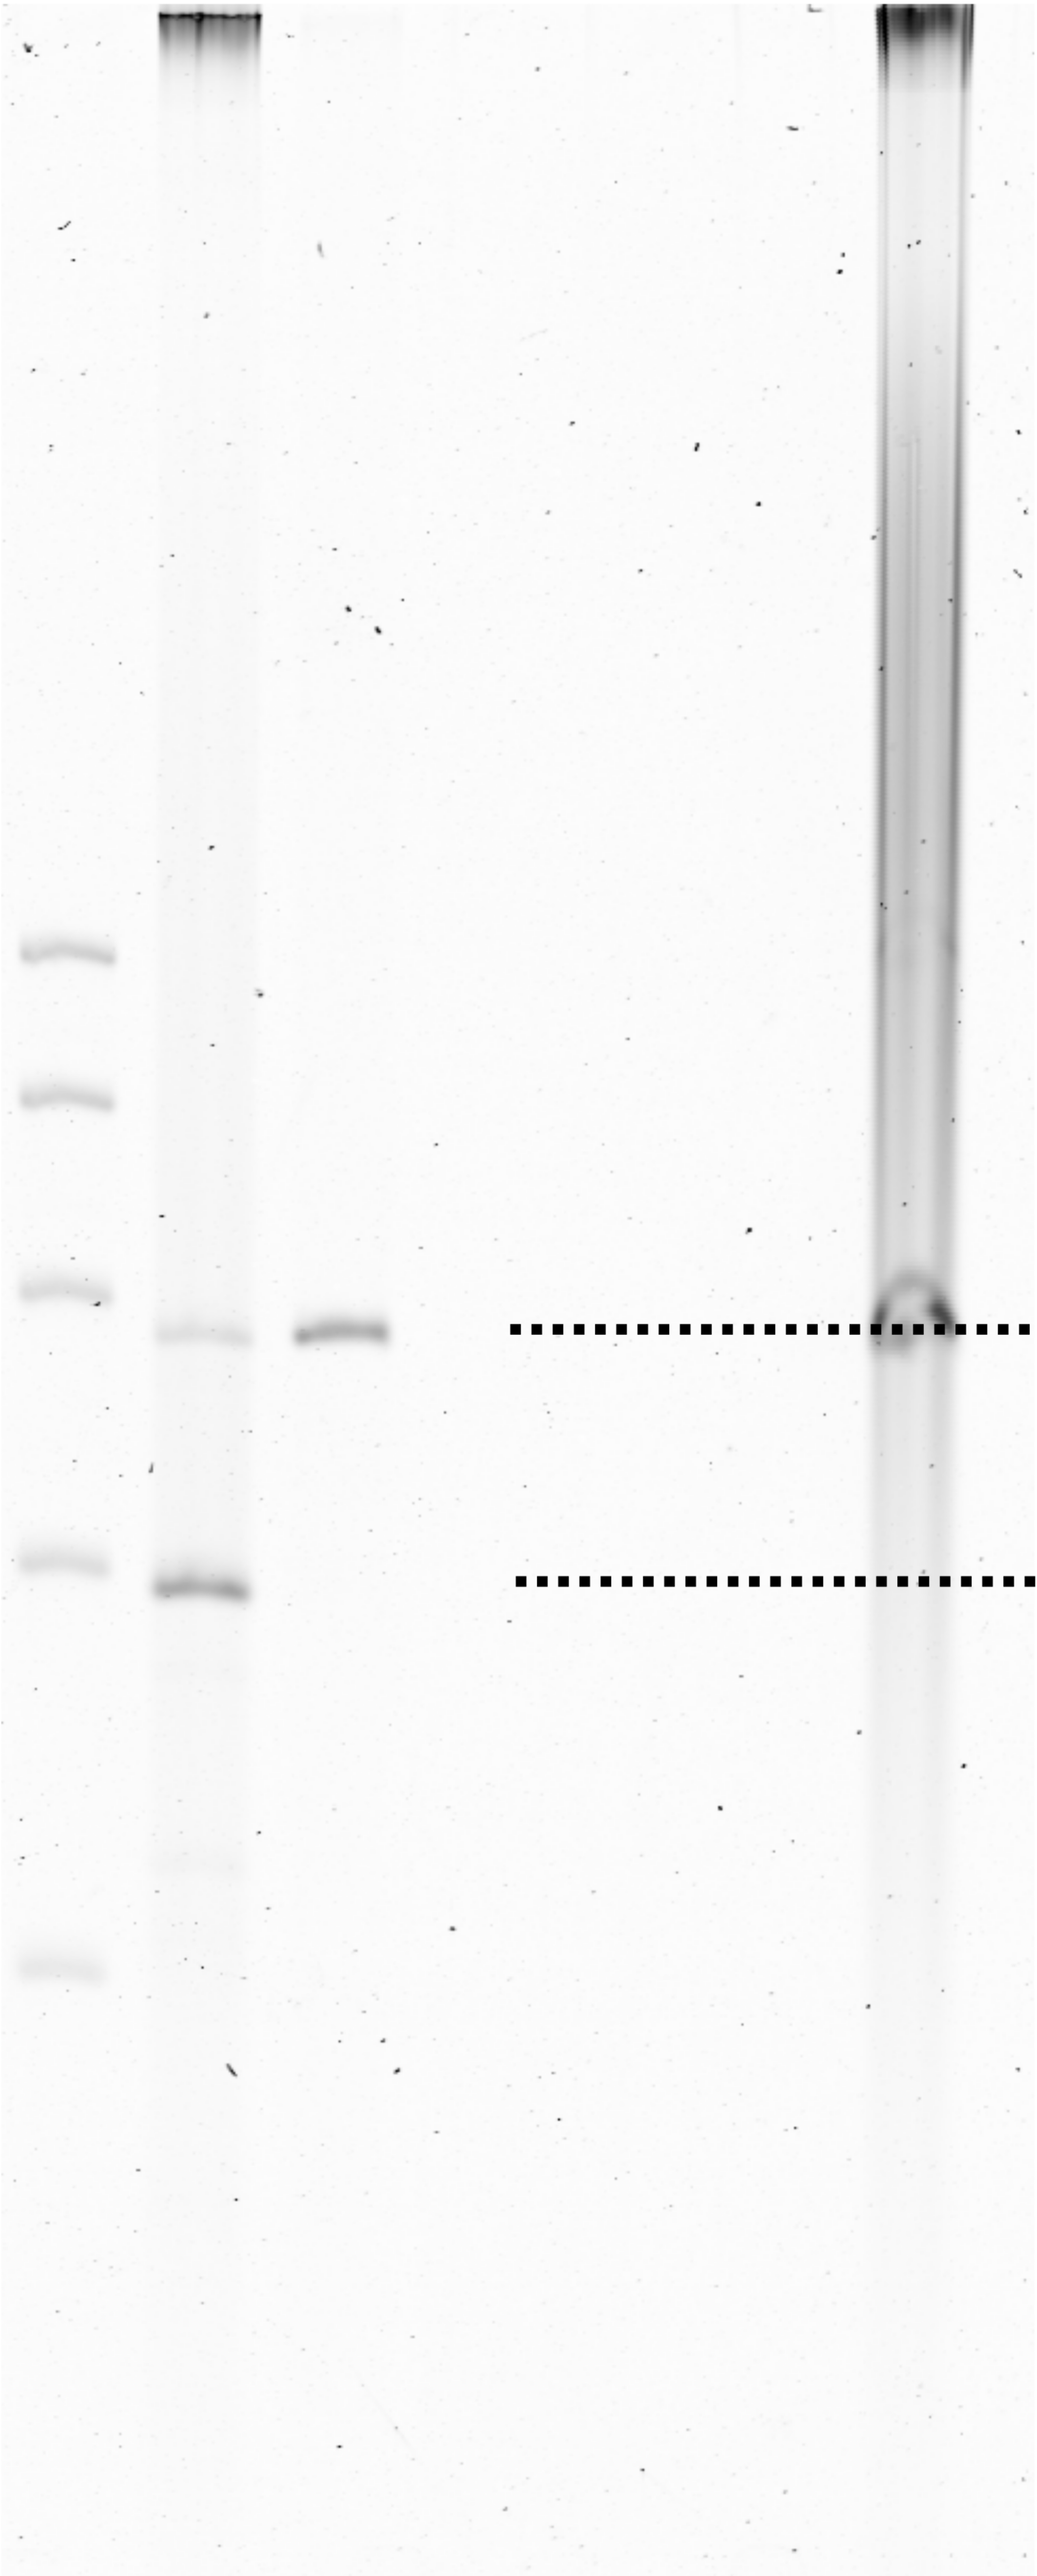

**Eco1**

**Eco2**

Supplement: fig2-data2 [file Figure 2 - source data 2.pdf › Figure 2 - source data 2/Figure 2 - source data 2.pdf]

L 4L FL 4LE 8LE 11LE FLE  
v1 v2 v3 v4 v1 v2 v3 v4

130 nt

110 nt

90 nt

70 nt

50 nt

30 nt

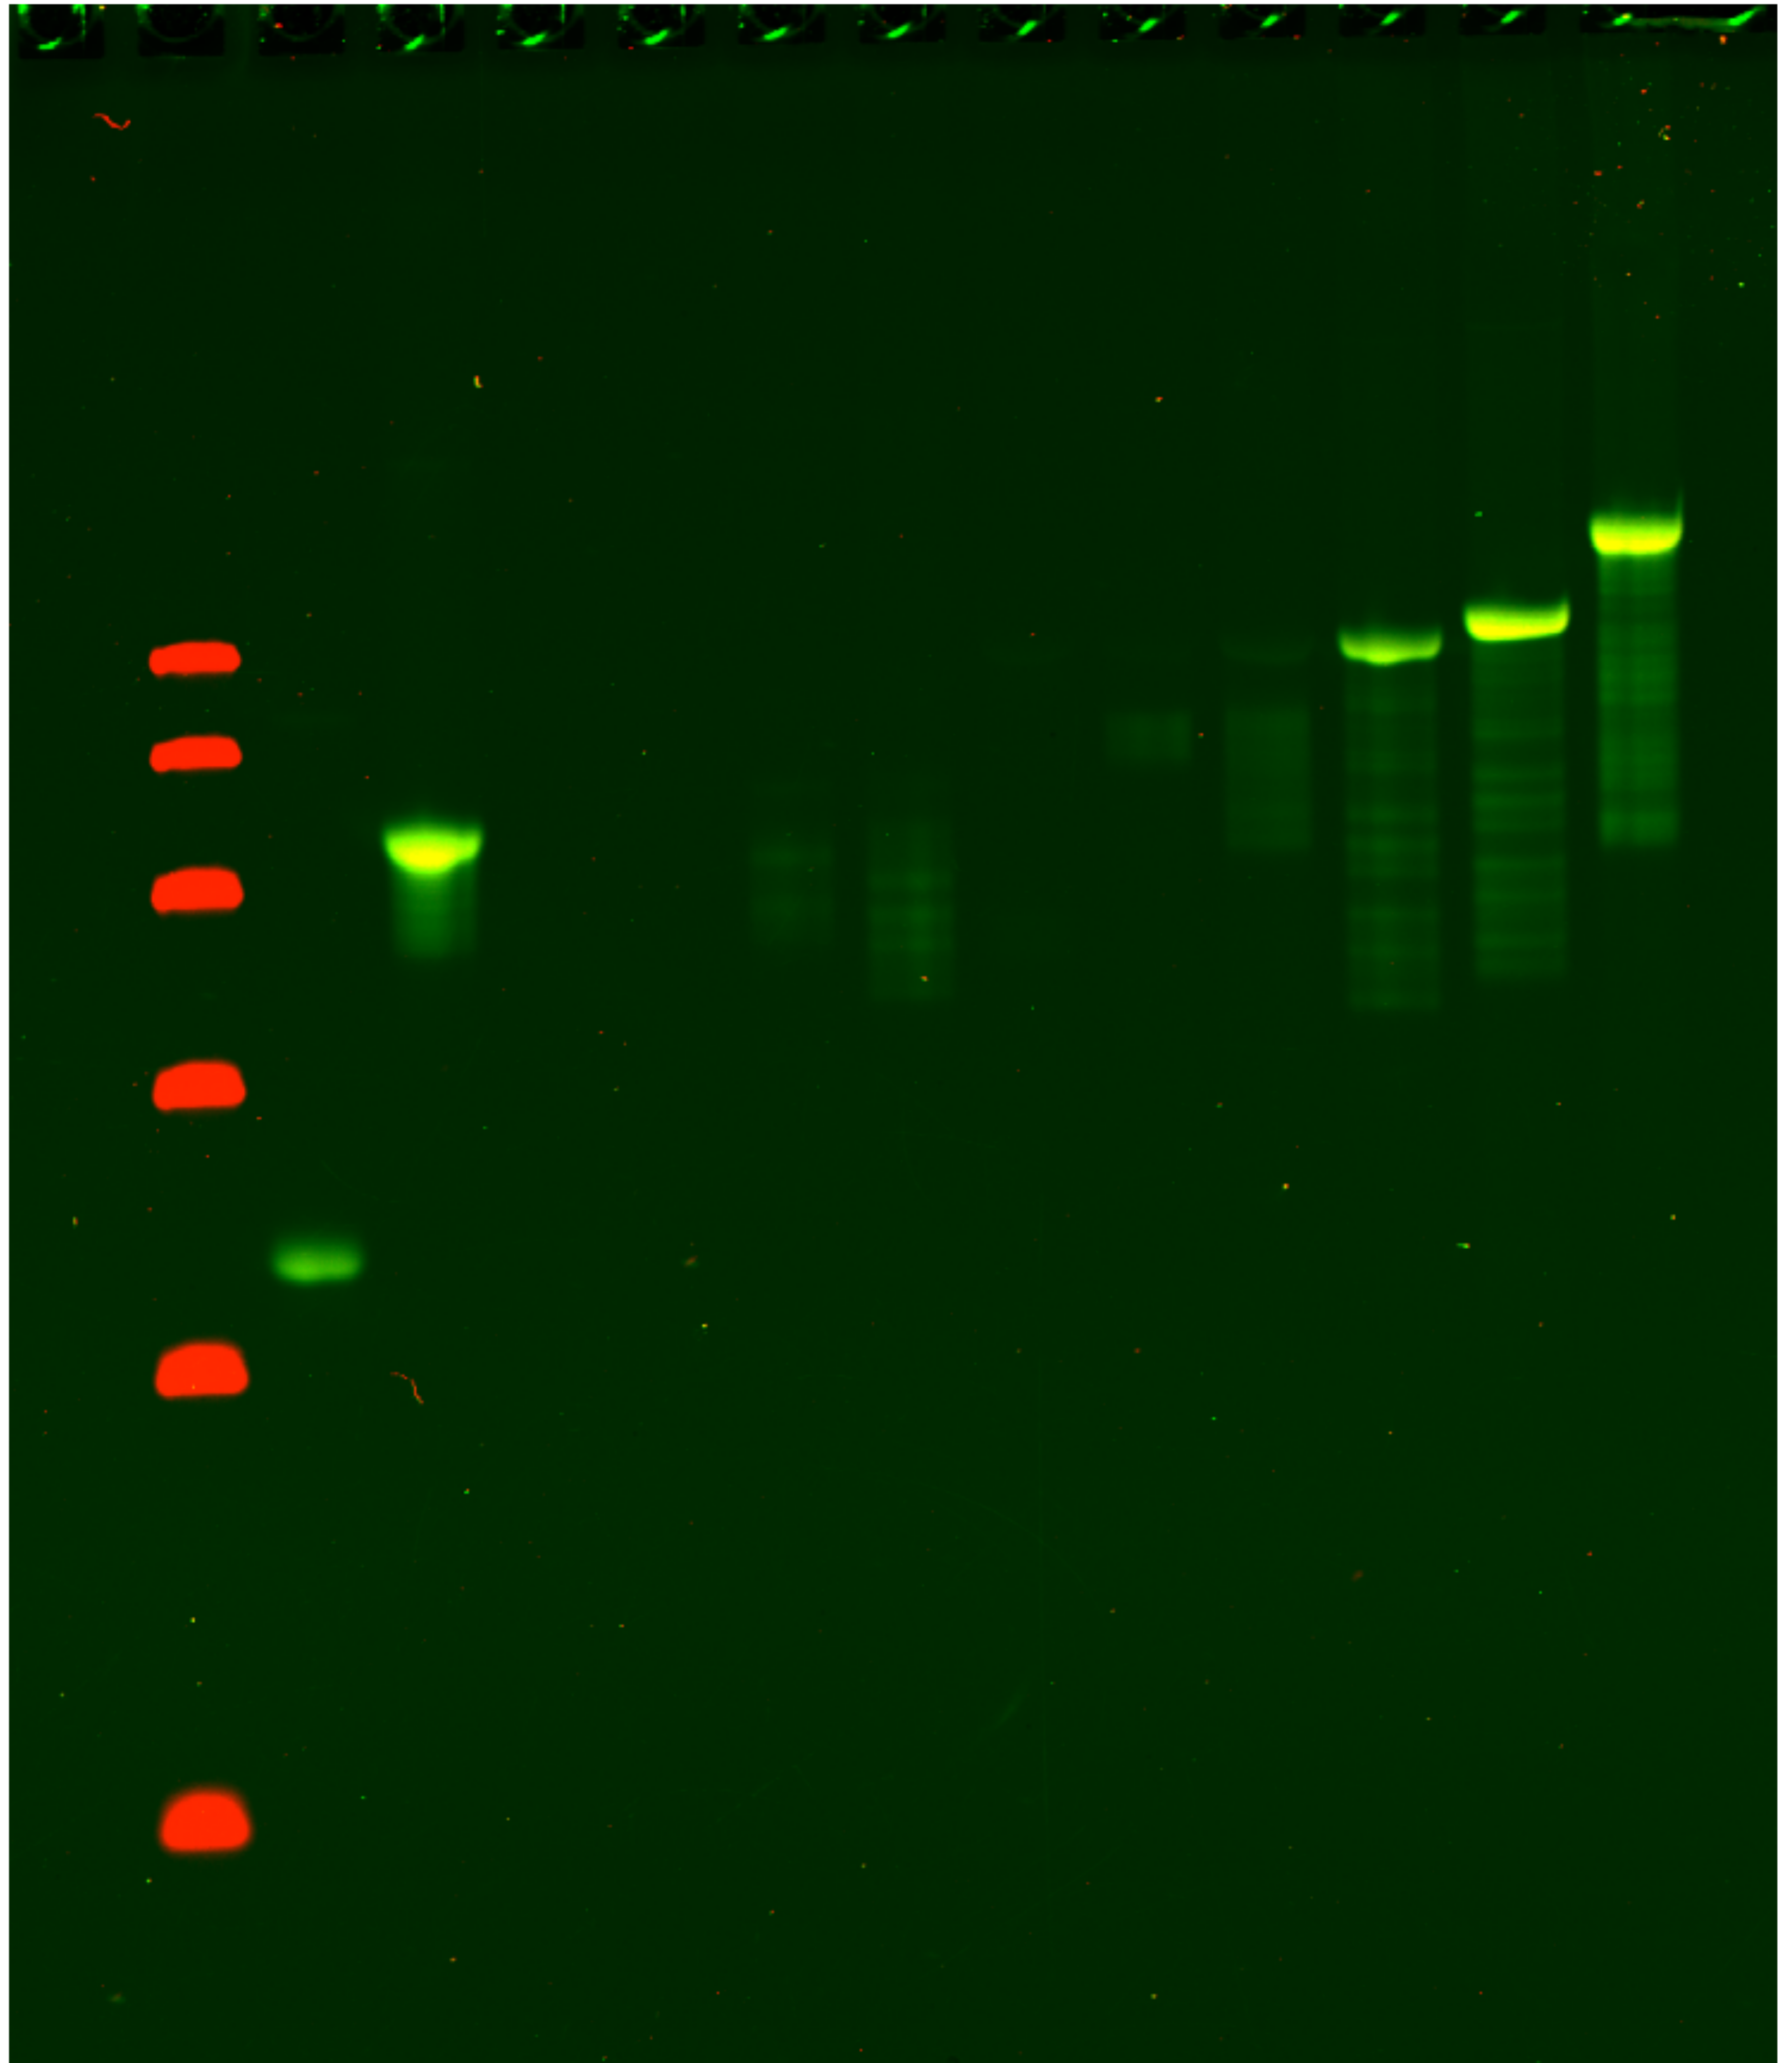

Supplement: fig3-data1 [file Figure 3 - source data 1.pdf › Figure 3 - source data 1/Figure 3 - source data 1.pdf]

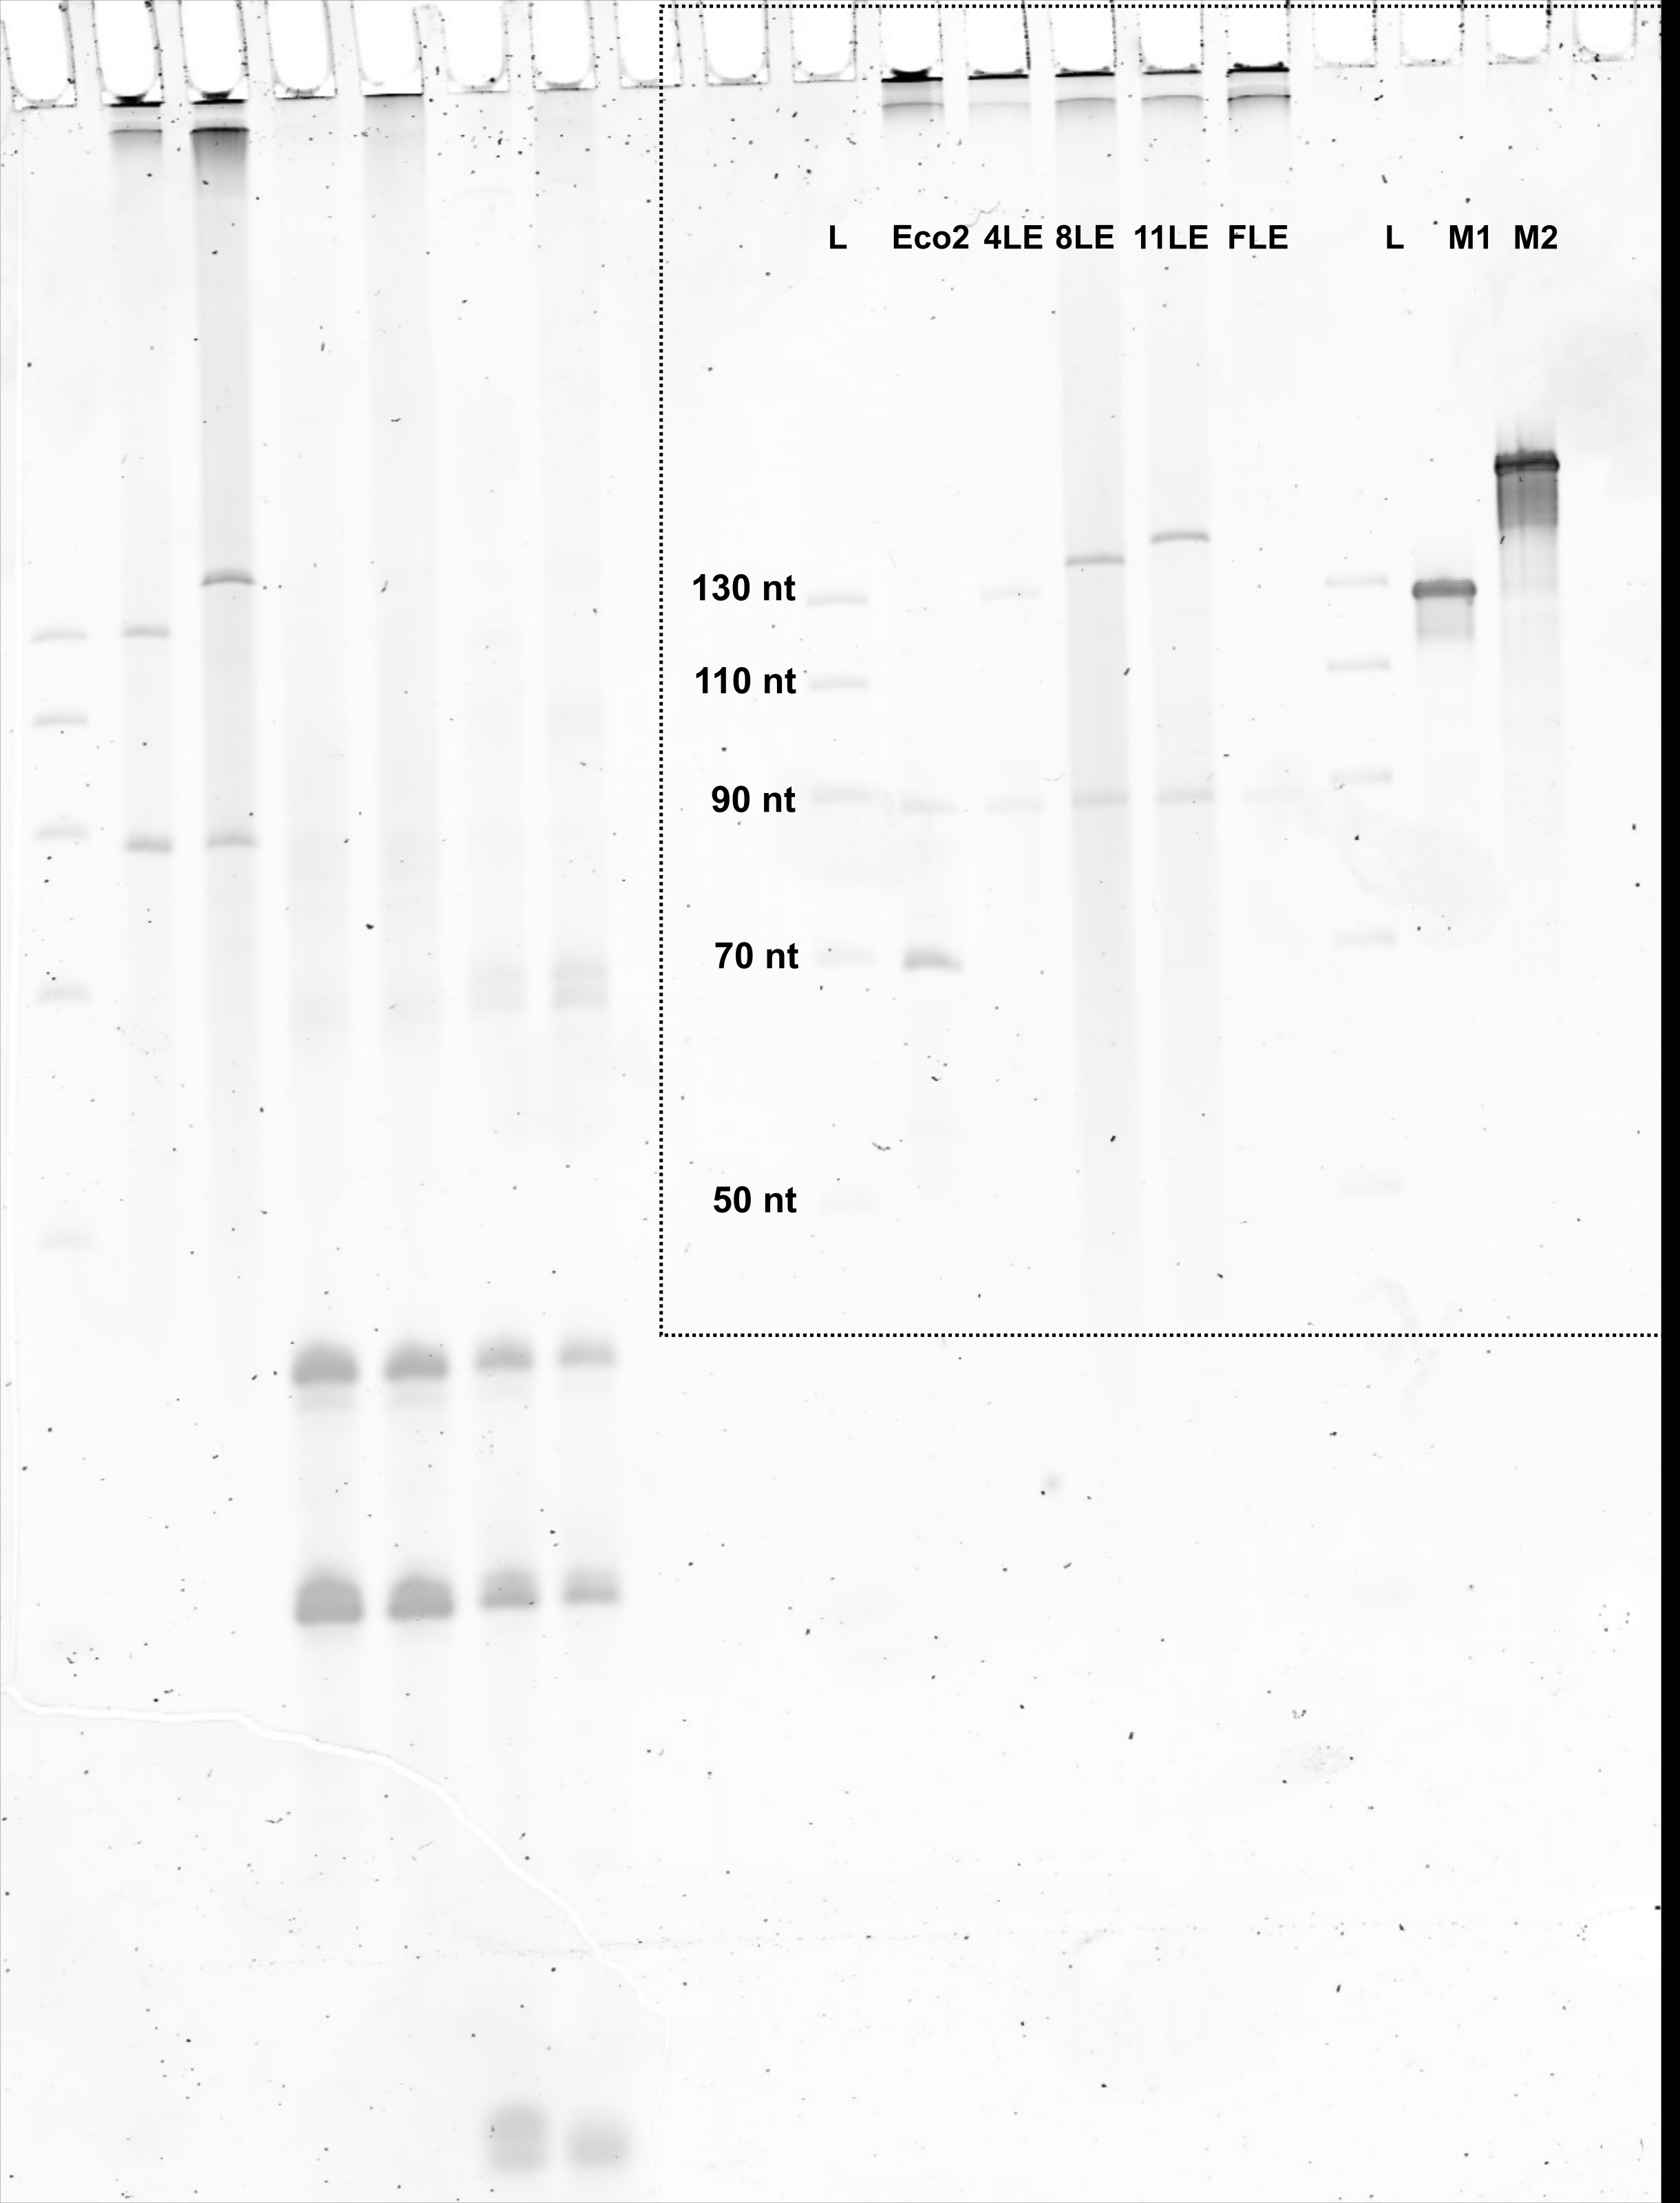

L Eco2 4LE 8LE 11LE FLE

L M1 M2

130 nt

110 nt

90 nt

70 nt

50 nt

Supplement: fig3-data3 [file Figure 3 - source data 3.pdf › Figure 3 - source data 3/Figure 3 - source data 3.pdf]

**8LEv4 oligo**

**Amount loaded (pmol)**

L 200 20 10 5 2 1 0.2

**Free lettuce (99 nt)**

**Amount loaded (pmol)**

200 20 10 5 2 1 0.2 L

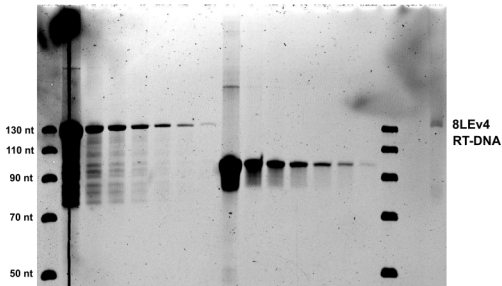

Supplement: fig3-data5 [file Figure 3 - source data 5.pdf › Figure 3 - source data 5/Figure 3 - source data 5.pdf]
